# Supplementary material
Source: MDPI journal article supplement (https://www.mdpi.com/1999-4907/11/1/10)

## Supplementary Material

### Transcriptomic Identification of Floral Transition and Development-Associated Genes in *Styrax japonicus*

Wei Li<sup>1</sup>✉, Zhengzhao Xu<sup>1</sup>✉, Cuiping Zhang<sup>1</sup>, Xinqiang Jiang<sup>1</sup>, Kuiling Wang<sup>1\*</sup>

<sup>1</sup> College of Landscape Architecture and Forestry, Qingdao Agricultural University, Qingdao, 266109, China;

✉These authors contributed equally to this work

\* Correspondence: klwang@qau.edu.; Tel.: +86-532-5897-7494

**Supplementary Figure 1** Identification and analysis of floral transition and flower development-associated transcription factor genes.

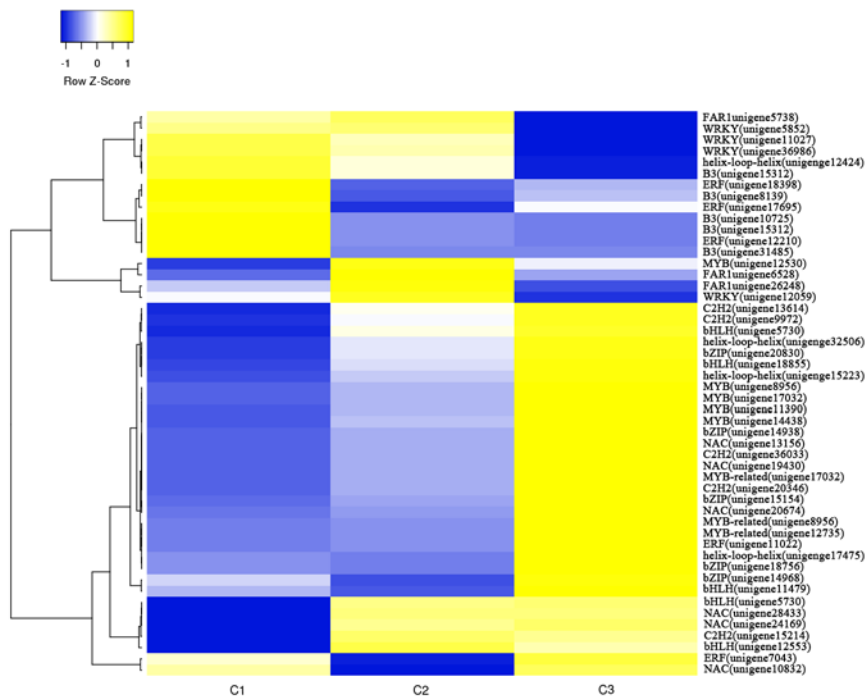

Supplement: s1 [file s1]
